# Supplementary material
Source: PubMed Central journal article supplement (PMC3913241)
Supplement: CJN.05750513_CJN05750513SupplementaryData1.pdf [file CJN.05750513_CJN05750513SupplementaryData1.pdf]

Medication treatment complexity and adherence in children with chronic kidney disease: A CKiD Study report.

Author Affiliations

**Tom D. Blydt-Hansen, MD**

Department of Pediatrics and Child Health, University of Manitoba, Children's Hospital at Health Sciences Center, Winnipeg, MB, Canada

**Christopher B Pierce, MHS**

Department of Epidemiology, Johns Hopkins Bloomberg School of Public Health, Baltimore, MD, USA

**Yi Cai, MD, PhD**

Department of Pediatrics, Michigan State University, Helen Devos Children's Hospital, Grand Rapids, MI, USA

**Dmitri Samsonov, MD**

Department of Pediatrics, New York Medical College, Valhalla, NY, USA

**Susan Massengill, MD**

Department of Pediatrics, Levine Children's Hospital at Carolinas Medical Center, Charlotte, NC, USA

**Marva Moxey-Mims, MD**

National Institute of Diabetes and Digestive and Kidney Diseases, National Institutes of Health, Bethesda, MD, USA

**Bradley A. Warady MD**

Department of Pediatrics, University of Missouri-Kansas City School of Medicine, Children's Mercy Hospital, Kansas City, MO, USA

**Susan L. Furth, MD, PhD**

Departments of Pediatrics and Epidemiology, Perelman School of Medicine at the University of Pennsylvania, Philadelphia, PA, USA
