# Supplementary material
Source: PubMed Central journal article supplement (PMC3913241)
Supplement: CJN.05750513_CJN05750513SupplementaryData2.pdf [file CJN.05750513_CJN05750513SupplementaryData2.pdf]

## Midwest Sites

Midwest Clinical Coordinating Center Principal Investigator: Bradley Warady, MD

| Sites                                              | Principal Investigator                                |
|----------------------------------------------------|-------------------------------------------------------|
| Children's Hospital of Winnipeg                    | Tom Blydt-Hansen, MD                                  |
| Egleston Children's Hospital, Emory University     | Larry Greenbaum, MD, PhD                              |
| Children's Mercy Hospital, Kansas City             | Bradley Warady, MD                                    |
| Seattle Children's Hospital                        | Joseph Flynn, MD                                      |
| University of New Mexico Children's Hospital       | Craig Wong, MD                                        |
| Cincinnati Children's Hospital and Medical Center  | Jens Goebel, MD <sup>a</sup> , Mark Mitsnefes, MD     |
| University of California, Los Angeles              | Isidro Salusky, MD; Ora Yadin, MD <sup>a</sup>        |
| Rainbow Babies and Children's Hospital             | Katherine Dell, MD                                    |
| Phoenix Children's Hospital                        | Bruce Morgenstern, MD                                 |
| British Columbia Children's Hospital               | Colin White, MD, FRCPC, FAAP                          |
| Children's Hospital of Alabama                     | Sahar Fathallah, MD                                   |
| St. Louis Children's Hospital                      | S. Paul Hmiel, MD                                     |
| Medical College of Wisconsin                       | Cynthia Pan, MD                                       |
| Oregon Health and Science University               | Amira Al-Uzri, MD <sup>a</sup> ; Randall Jenkins, MD  |
| UCSF Children's Hospital                           | Anthony Portale, MD                                   |
| University of Texas Southwestern Medical Center    | Mouin Seikaly, MD                                     |
| Oklahoma University Health Sciences Center         | Martin Turman, MD, PhD                                |
| Stanford University Medical Center                 | Cynthia Wong, MD <sup>a</sup> ; Steven Alexander, MD  |
| LeBonheur Children's Medical Center                | Colleen Hastings, MD                                  |
| Northwest Pediatric Kidney Specialist <sup>b</sup> | Randall Jenkins, MD                                   |
| Children's Hospital of Boston                      | Nancy Rodig, MD <sup>a</sup> ; William Harmon, MD     |
| University of Wisconsin                            | Sharon Bartosh, MD                                    |
| University of California, San Diego                | Nadine Benador, MD <sup>a</sup> ; Robert Mak, MD, PhD |
| Cardinal Glennon Hospital                          | Ellen Wood, MD                                        |
| Children's Kidney Specialists, Idaho               | Randall Jenkins, MD                                   |
| Children's Hospital of Los Angeles <sup>b</sup>    | Gary Lerner, MD                                       |
| Vanderbilt University Medical Center <sup>c</sup>  | Deborah Jones, MD                                     |

<sup>a</sup> Clinical Site Principal Investigator

<sup>b</sup> No longer participating site that enrolled children in the study

<sup>c</sup> New participating site

## East Coast Sites

East Coast Clinical Coordinating Center Principal Investigator: Susan Furth, MD, PhD

---

| Sites                                                | Principal Investigator                            |
|------------------------------------------------------|---------------------------------------------------|
| Children's Hospital of Philadelphia                  | Susan Furth, MD, PhD                              |
| University of Michigan, Mott Hospital                | Debbie Gipson, MD                                 |
| Texas Children's Hospital, Baylor <sup>b</sup>       | Poyyapakkam Srivaths, MD                          |
| East Carolina University <sup>b</sup>                | Guillermo Hidalgo, MD                             |
| University of Texas, Houston                         | Joshua Samuels, MD                                |
| Children's Hospital at Montefiore                    | Frederick Kaskel, MD, PhD                         |
| Carolinas Medical Center                             | Susan Massengill, MD                              |
| University of Virginia                               | Victoria Norwood, MD                              |
| University of Maryland                               | Susan Mendley, MD                                 |
| DeVos Children's Hospital at Spectrum                | Yi Cai, MD                                        |
| Riley Hospital for Children at Indiana Univ. Health  | Sharon Andreoli, MD, PhD                          |
| Johns Hopkins Children's Center                      | Meredith Atkinson, MD                             |
| University of Rochester Medical Center, Golisano     | Marc Lande, MD <sup>a</sup> , George Schwartz, MD |
| Children's Hospital at Strong                        |                                                   |
| Mount Sinai Medical Center                           | Jeffrey Saland, MD                                |
| University of Iowa                                   | Patrick Brophy, MD                                |
| Hospital for Sick Children (Sick Kids)               | Rulan Parekh, MD <sup>a</sup> ; Lisa Robinson, MD |
| University of Florida                                | Richard Neiberger, MD                             |
| Nationwide Children's Hospital, Ohio State Univ.     | Hiren Patel, MD                                   |
| University of North Carolina, Chapel Hill            | Maria Ferris, MD                                  |
| Children's Hospital of Michigan                      | Tej Matoo, MD                                     |
| Maimonides Medical Center                            | Juan Kupferman, MD                                |
| Robert Wood Johnson Medical School – UMDNJ           | Lynne Weiss, MD                                   |
| Ann & Robert H. Lurie Children's Hospital of Chicago | Craig Langman, MD                                 |
| University of Illinois, Chicago                      | Eunice John, MD                                   |
| INOVA Fairfax Hospital for Children                  | Lauren Weintraub, MD                              |
| Children's National Medical Center                   | Kanwal Kher, MD                                   |
| Maria Fareri Children's Hospital at Westchester      | Dmitry Samsonov, MD                               |
| SUNY Downstate Medical Center <sup>b</sup>           | Anil Mongia, MD                                   |

---

<sup>a</sup> Clinical Site Principal Investigator

<sup>b</sup> New participating site
